# Supplementary material for: The role of autophagy in high-fat diet-induced insulin resistance of adipose tissues in mice
Source: PeerJ. 2022 Aug 15;10:e13867. doi: 10.7717/peerj.13867 (PMC9387522; doi:10.7717/peerj.13867)
Supplement: Supplemental Information 2 — The results from western blot, qPCR, and free fatty acid analysis. [file peerj-10-13867-s002.xlsx]

## Sheet: InVivo-HFD-8&16w
In Vivo-HFD-8w												In Vivo-HFD-16w
LC3-II						p62						LC3-II						p62						CHOP						Cleaved caspase-3
	LC3-II	GAPDH	LC3-II/GAPDH	Fold change			p62	GAPDH	p62/GAPDH	Fold change			LC3-II	GAPDH	LC3-II/GAPDH	Fold change			p62	GAPDH	p62/GAPDH	Fold change			CHOP	GAPDH	CHOP/GAPDH	Fold change			CC3	GAPDH	CC3/GAPDH	Fold change
CT1	3318302	13292805	0.249631	0.0966767		CT1	695361	10042776	0.0692399	0.710442		CT1	2631150	16720421	0.157361	0.141932		CT1	1977338	16147824	0.122452	1.50114		CT1	1321902	3601404	0.367052	0.666374		CT1	3489000	3185160	1.09539	0.73541
CT2	21189325	18544844	1.1426	0.442503		CT2	554336	14278680	0.0388226	0.398343		CT2	14250071	14484275	0.98383	0.887363		CT2	1162392	16362936	0.0710381	0.870855		CT2	853866	2403956	0.355192	0.644843		CT2	4610368	2116404	2.1784	1.4625
CT3	39796281	10594850	3.75619	1.45469		CT3	652698	9819124	0.0664721	0.682043		CT3	10521315	14287533	0.736398	0.664192		CT3	514386	16966720	0.0303174	0.37166		CT3	1411360	1915992	0.736621	1.33732		CT3	3518721	2644501	1.33058	0.893308
CT4	33872630	6539016	5.18008	2.00613		CT4	2254210	10469760	0.215307	2.20917		CT4	10994240	10095688	1.089	0.982223		CT4	1473504	12622400	0.116737	1.43108		CT4	1168752	1276130	0.915857	1.66272		CT4	2924737	1647351	1.77542	1.19196
HFD1	23910462	13952088	1.71376	0.663699		HFD1	6064300	12763960	0.475111	4.87492		CT5	22647480	14568516	1.55455	1.40212		CT5	1057408	15265480	0.0692679	0.849154		CT5	1309097	2760552	0.474216	0.860928		CT5	3258819	2526064	1.29008	0.866116
HFD2	24808428	12218076	2.03047	0.786356		HFD2	4295824	10794470	0.397965	4.08336		CT6	26565880	12465609	2.13113	1.92217		CT6	1129696	14187870	0.0796241	0.97611		CT6	771280	1691480	0.455979	0.82782		CT6	2586075	2040904	1.26712	0.850704
HFD3	41037679	9904752	4.14323	1.60458		HFD3	14171897	12965667	1.09303	11.2152		HFD1	14962374	11771838	1.27103	1.1464		HFD1	2669918	17981166	0.148484	1.82026		HFD1	1366822	1845060	0.740801	1.34491		HFD1	4603199	2118694	2.17266	1.45865
HFD4	28935102	7918416	3.65415	1.41517		HFD4	3394662	11151171	0.304422	3.12355		HFD2	20548711	11787182	1.74331	1.57237		HFD2	4806818	15501895	0.310079	3.80126		HFD2	3143205	1717030	1.83061	3.32342		HFD2	6673212	1965018	3.39601	2.27997
												HFD3	27623064	13256508	2.08374	1.87942		HFD3	7019571	16287684	0.430974	5.28331		HFD3	2791761	1608160	1.736	3.15166		HFD3	5032040	2143435	2.34765	1.57614
	CT	HFD					CT	HFD				HFD4	45607968	14653142	3.1125	2.80731		HFD4	4645624	13953899	0.332927	4.08134		HFD4	2195876	1922184	1.14239	2.07398		HFD4	3182946	1990341	1.5992	1.07365
AVG	1	1.11745				AVG	1	5.82424				HFD5	20302095	12931907	1.56992	1.41599		HFD5	2968710	17158592	0.173016	2.121		HFD5	1873058	2327328	0.80481	1.46111		HFD5	7608353	2590444	2.93708	1.97186
SEM	0.442138	0.231201				SEM	0.409169	1.83229				HFD6	31415384	14538231	2.16088	1.949		HFD6	2928930	17354610	0.16877	2.06894		HFD6	1291541	1585746	0.814469	1.47865		HFD6	9841556	2498610	3.93881	2.64439
													CT	HFD					CT	HFD					CT	HFD					CT	HFD
												AVG	1	1.79508				AVG	1	3.19602				AVG	1	2.13896				AVG	1	1.83411
												SEM	0.249943	0.235903				SEM	0.170469	0.572292				SEM	0.167273	0.36326				SEM	0.11141	0.23524
Rubicon						Atg5
	Rubicon	GAPDH	Rubicon/GAPDH	Fold change			Atg5	GAPDH	Atg5/GAPDH	Fold change
CT1	759168	11892442	0.0638362	0.628367		CT1	4227048	13826320	0.305725	0.382189
CT2	1653120	20024760	0.0825538	0.812612		CT2	6459014	18608372	0.347103	0.433916
CT3	2926074	24904347	0.117493	1.15653		CT3	11156075	10675368	1.04503	1.3064		Rubicon						Atg5						p-Akt/Akt
CT4	2833358	19885988	0.14248	1.40249		CT4	10690668	7118274	1.50186	1.87749			Rubicon	GAPDH	Rubicon/GAPDH	Fold change			Atg5	GAPDH	Atg5/GAPDH	Fold change			p-Akt	Akt	p-Akt/Akt	Fold change
HFD1	13973256	18480024	0.756128	7.44289		HFD1	13634136	14090562	0.967608	1.20962		CT1	6668673	25146768	0.26519	0.697712		CT1	5102204	16720421	0.305148	0.771468		CT1	922425	7344400	0.125596	0.228782
HFD2	9305478	18528686	0.50222	4.94357		HFD2	10485396	12575188	0.833816	1.04236		CT2	8209344	18348680	0.447408	1.17712		CT2	3781440	14484275	0.261072	0.660036		CT2	5754924	5413650	1.06304	1.93641
HFD3	15464820	19639764	0.787424	7.75095		HFD3	15947750	10087495	1.58094	1.97635		CT3	6744573	15770950	0.427658	1.12516		CT3	4538664	14287533	0.317666	0.803116		CT3	4850644	9044222	0.536325	0.976958
HFD4	3321952	17155753	0.193635	1.90603		HFD4	9959076	8246494	1.20767	1.50972		HFD1	35661395	12625614	2.82453	7.4313		CT4	5743472	10095688	0.568903	1.43829		CT4	1826100	6055218	0.301575	0.549342
												HFD2	20450395	15784713	1.29558	3.40866		CT5	5925850	14568516	0.406757	1.02835		CT5	2635436	9357700	0.281633	0.513016
	CT	HFD					CT	HFD				HFD3	15803445	16961495	0.931725	2.45136		CT6	6403644	12465609	0.513705	1.29874		CT6	6347415	6439628	0.98568	1.79549
AVG	1	5.51086				AVG	1	1.43451										HFD1	7330144	11771838	0.622685	1.57426		Ins1	18296430	4922328	3.71703	6.77085
SEM	0.173139	1.35608				SEM	0.36125	0.204859					CT	HFD				HFD2	8903666	11787182	0.755369	1.90971		Ins2	8174628	4122387	1.98298	3.61216
												AVG	1	4.43044				HFD3	9094388	13256508	0.686032	1.73441		Ins3	15402464	3465418	4.44462	8.09622
												SEM	0.151887	1.52567				HFD4	12770667	14653142	0.871531	2.20338		Ins4	24499656	4246506	5.76937	10.5094
																		HFD5	7615405	12931907	0.588885	1.48881		Ins5	30544920	3428298	8.90965	16.2296
																		HFD6	11876254	14538231	0.816898	2.06526		Ins6	13628860	3271750	4.16562	7.588
																								HFD1	2550918	5311000	0.480308	0.874919
																			CT	HFD				HFD2	4901920	8281200	0.591934	1.07825
																		AVG	1	1.8293				HFD3	2247696	9857472	0.22802	0.415355
																		SEM	0.127634	0.11432				HFD4	4775328	6882727	0.693813	1.26383
																								HFD5	1621224	10879275	0.149019	0.271451
																								HFD6	1613496	7014517	0.230022	0.419004
																								HFD+Ins1	5489172	8792952	0.62427	1.13716
																								HFD+Ins2	12531280	4605650	2.72085	4.95624
																								HFD+Ins3	1981700	6777939	0.292375	0.532584
																								HFD+Ins4	3388242	8767902	0.386437	0.703925
																								HFD+Ins5	18775380	2525675	7.43381	13.5413
																								HFD+Ins6	8413314	3423456	2.45755	4.47662
																									CT	Ins	HFD	HFD+Ins
																								AVG	1	8.80103	0.720469	4.22463
																								SEM	0.291275	1.74276	0.166604	2.02449

## Sheet: InVivo-HFD-Serum Conc.
InVivo-HFD-FFA(8w&16w)
FFA conc.
		8w	16w
CT	AVG	563.994	391.333
	SEM	110.572	226.807
HFD	AVG	426.843	821.993
	SEM	120.754	271.079

## Sheet: InVivo-CQ-10h&24h
InVivo-CQ-10hr										InVivo-CQ-24hr
p-Akt/Akt										p-Akt/Akt						p-GSK3b/GSK3b						p62						LC3-II
	p-Akt	GAPDH	p-Akt/GAPDH	Akt	GAPDH	Akt/GAPDH	p-Akt/Akt	Fold change			p-Akt	Akt	p-Akt/Akt	Fold change			p-GSK3b	GSK3b	p-GSK3b/GSK3b	Fold change			p62	GAPDH	p62/GAPDH	Fold change			LC3-II	GAPDH	LC3-II/GAPDH	Fold change
CT1	2520930	9383280	0.268662	12268560	10382944	1.18161	0.22737	1.22483		CT1	9769526	5204760	1.87704	2.67726		CT1	10926614	12453870	0.877367	1.17997		CT1	8921216	8974911	0.994017	1.52461		CT1	5138406	10097076	0.5089	0.501871
CT2	1379610	5374260	0.256707	8019180	5306640	1.51116	0.169874	0.915105		CT2	4611981	11187957	0.412227	0.587969		CT2	11253048	20118153	0.559348	0.752264		CT2	5186208	9435756	0.549634	0.843018		CT2	6976680	5917680	1.17896	1.16267
CT3	3752190	8703000	0.431138	8731860	3354900	2.60272	0.165649	0.892344		CT3	7526409	7387149	1.01885	1.45321		CT3	14098168	22031229	0.639917	0.860621		CT3	5521792	7064838	0.781588	1.19879		CT3	6379577	7677714	0.830921	0.819443
CT4	2254110	5761890	0.39121	10072110	4625040	2.17773	0.179641	0.967718		CT4	2968482	15863760	0.187123	0.266898		CT4	13337874	12955074	1.02955	1.38463		CT4	2012352	5767410	0.348918	0.535164		CT4	7789320	5608656	1.3888	1.36962
Ins1	6130590	6599250	0.928983	8037630	4270980	1.88192	0.493636	2.6592		CT5	6205990	11869968	0.522831	0.745725		CT5	12852378	13852509	0.927801	1.24779		CT5	5385600	9194229	0.585759	0.898426		CT5	5439492	5269770	1.03221	1.01795
Ins2	8037900	4227090	1.90152	6667620	3500340	1.90485	0.998253	5.37755		CT6	3439029	18238920	0.188554	0.268939		CT6	9604518	22475280	0.427337	0.574723		CQ1	7546932	7949200	0.949395	1.45617		CT6	9150792	7997154	1.14426	1.12845
Ins3	11048880	8526210	1.29587	10425240	3740910	2.78682	0.465001	2.50494		Ins1	15267700	4086522	3.73611	5.3289		Ins1	14987574	17258439	0.86842	1.16793		CQ2	6783136	6090903	1.11365	1.7081		CQ1	15086877	7433217	2.02966	2.00162
Ins4	2202930	6330540	0.347985	10269540	4380360	2.34445	0.148429	0.799581		Ins2	12941775	6124866	2.11299	3.0138		Ins2	25438716	17461719	1.45683	1.95928		CQ3	4726112	5179350	0.912491	1.39956		CQ2	18530460	8602152	2.15417	2.12441
CQ1	1932900	5091900	0.379603	4915470	4195590	1.17158	0.324009	1.28473		Ins3	8392461	6817800	1.23096	1.75575		Ins3	13109142	14317710	0.915589	1.23137		CQ4	12884184	11397112	1.13048	1.73391		CQ3	4221648	4695207	0.89914	0.886719
CQ2	4301700	5414640	0.794457	5771220	2536800	2.275	0.349212	0.760322		Ins4	15534600	4975674	3.12211	4.45313		Ins4	39344394	12279498	3.20407	4.30914		CQ5	3297252	5313708	0.620518	0.95174		CQ4	5104160	4847703	1.0529	1.03836
CQ3	1153260	7477740	0.154226	4054950	3089790	1.31237	0.117517	0.220014		Ins5	4967919	7751832	0.64087	0.914087		Ins5	13389090	7486380	1.78846	2.40529								CQ5	7359885	10891653	0.675736	0.666402
CQ4	3029370	4518510	0.670436	6494220	2630010	2.46928	0.271511	0.515857		Ins6	2007687	10885248	0.184441	0.263072		Ins6	9593780	11203150	0.856347	1.1517
CQ+Ins1	8340240	5173380	1.61215	9405120	4633380	2.02986	0.794214	1.6412		CQ1	6206046	9540300	0.650508	0.927834		CQ1	7289906	24503222	0.297508	0.400117			CT	CQ					CT	CQ
CQ+Ins2	10350510	5048940	2.05004	7452540	1913520	3.89468	0.526369	1.6364		CQ2	3329997	15816132	0.210544	0.300304		CQ2	11303096	21244047	0.532059	0.715563		AVG	1	1.44989				AVG	1	1.3435
CQ+Ins3	6496890	5517480	1.17751	4409610	2230290	1.97715	0.595561	2.53655		CQ3	1811799	17550870	0.103231	0.147241		CQ3	6558294	13732224	0.477584	0.6423		SEM	0.16819	0.141078				SEM	0.123913	0.300263
CQ+Ins4	5614710	6030990	0.930977	10909620	4992900	2.18503	0.426071	1.60441		CQ4	1535721	16569993	0.0926808	0.132193		CQ4	16638039	12776610	1.30223	1.75136
										CQ5	5202136	11409255	0.455958	0.650342		CQ5	14478024	21884724	0.661558	0.889726
	CT	Ins	CQ	CQ+Ins						CQ6	6675836	7344183	0.908996	1.29652		CQ6	6814269	6398271	1.06502	1.43234
AVG	1	2.83532	0.695231	1.85464						CQ+Ins1	7180140	6015207	1.19366	1.70255		CQ+Ins1	7099642	11890065	0.597107	0.803046
SEM	0.076588	0.946367	0.225417	0.227449						CQ+Ins2	4291551	12562252	0.341623	0.487264		CQ+Ins2	26079222	19465182	1.33979	1.80187
										CQ+Ins3	3592236	14168160	0.253543	0.361634		CQ+Ins3	11472688	18454953	0.621659	0.836065		PHLPP1						PTEN
										CQ+Ins4	2543838	15641373	0.162635	0.23197		CQ+Ins4	10236501	12142317	0.843043	1.1338			PHLPP1	GAPDH	PHLPP1/GAPDH	Fold change			PTEN	GAPDH	PTEN/GAPDH	Fold change
										CQ+Ins5	1266936	14131755	0.0896517	0.127872		CQ+Ins5	5366856	9974745	0.538044	0.723613		CT1	21336210	12345723	1.72823	1.6738		CT1	9899076	9859480	1.00402	1.04039
										CQ+Ins6	742945	6194034	0.119945	0.171081		CQ+Ins6	1984488	1413852	1.4036	1.8877		CT2	9692480	11803162	0.821177	0.795317		CT2	6641982	6947527	0.956021	0.990656
																						CT3	20355192	12306490	1.65402	1.60193		CT3	5958702	8343241	0.714195	0.740069
											CT	Ins	CQ	CQ+Ins			CT	Ins	CQ	CQ+Ins		CT4	11224406	19739031	0.56864	0.550733		CT4	10843294	11082206	0.978442	1.01389
										AVG	1	2.62146	0.575739	0.513728		AVG	1	2.03745	0.9719	1.19768		CT5	14551556	13948233	1.04325	1.0104		CT5	9026710	7521423	1.20013	1.24361
										SEM	0.379689	0.817837	0.191944	0.243777		SEM	0.129537	0.499745	0.210364	0.212642		CT6	6563271	17282256	0.379769	0.36781		CT6	6269164	6687648	0.937424	0.971385
																						CQ1	16539280	12419346	1.33174	1.2898		CQ1	7118648	10566960	0.67367	0.698076
																						CQ2	8117522	18390880	0.441388	0.427489		CQ2	9456876	10476960	0.902635	0.935336
																						CQ3	5413366	17574102	0.308031	0.298331		CQ3	3650342	9414462	0.387738	0.401785
																						CQ4	6564810	19574000	0.335384	0.324823		CQ4	16716770	10369125	1.61217	1.67057
																						CQ5	5951640	13927698	0.427324	0.413867		CQ5	9079122	7498160	1.21085	1.25471
																						CQ6	1747362	20225915	0.0863922	0.0836717		CQ6	3470108	9138207	0.379736	0.393493
																							CT	CQ					CT	CQ
																						AVG	1	0.472996				AVG	1	0.892329
																						SEM	0.220593	0.170955				SEM	0.0657371	0.20543

## Sheet: InVivo-CQ-24h(mRNA)
InVivo-CQ-24hr
LC3B mRNA expression
	DCT	Mean DCT, 15w	2^-DDCT
CT1	1.3495	1.43794	1.06322
CT2	1.17575	1.43794	1.1993
CT3	0.578157	1.43794	1.81477
CT4	2.15711	1.43794	0.607447
CT5	1.92919	1.43794	0.711408
CQ1	2.06417	1.43794	0.647868
CQ2	2.73084	1.43794	0.408131
CQ3	2.30679	1.43794	0.547584
CQ4	2.70952	1.43794	0.414208
CQ5	2.07066	1.43794	0.644959
	CT	CQ
AVG	1.07923	0.53255
SEM	0.213724	0.0527471

## Sheet: InVitro-autophagic flux(FFA)
3T3-L1+FFA-Autophagic flux(via LC3-II)
	LC3-II	GAPDH	LC3-II/GAPDH	Fold change
CT1	2031290	13210887	0.153759	0.806374
CT2	2679473	11634732	0.2303	1.20778
CT3	2289480	12179401	0.18798	0.985842
CT+Baf1	6316360	12796006	0.49362	2.58874
CT+Baf2	8792964	13102040	0.671114	3.5196
CT+Baf3	7208331	10453610	0.689554	3.6163
FFA1	1628440	12176672	0.133734	0.701358
FFA2	3360821	13560642	0.247836	1.29976
FFA3	2302765	12331761	0.186734	0.979312
FFA+Baf1	4727556	11012724	0.429281	2.25133
FFA+Baf2	5882630	13444092	0.437562	2.29476
FFA+Baf3	4727556	14720022	0.321165	1.68432
	CT	CT+Baf	FFA	FFA+Baf
AVG	1	3.24155	0.993475	2.0768
SEM	0.116093	0.327594	0.172888	0.19664

## Sheet: InVitro-CQ-24hr
InVitro-CQ-24hr
p62						LC3-II						p-Akt/Akt
	p62	GAPDH	p62/GAPDH	Fold Change			LC3-II	GAPDH	LC3-II/GAPDH	Fold change			p-Akt	Akt	p-Akt/Akt	Fold change
CT1	3084650	18839246	0.163735	0.612091		CT1	1318548	20257772	0.0650885	0.666328		CT1	8739978	10034605	0.870984	1.38281
CT2	4127868	10887200	0.379149	1.41737		CT2	1921752	14484802	0.132674	1.35821		CT2	7138040	11547030	0.618171	0.981437
CT3	3331688	12832880	0.259621	0.97054		CT3	1627920	17084730	0.0952851	0.975458		CT3	5522844	13792119	0.400435	0.635749
Ins1	3640608	14833226	0.245436	0.917512		Ins1	3548118	23557926	0.150612	1.54186		Ins1	16180894	11239734	1.43962	2.2856
Ins2	3486991	12315838	0.283131	1.05843		Ins2	2307357	15906189	0.14506	1.48502		Ins2	15086988	9365742	1.61087	2.55749
Ins3	4963104	9480544	0.523504	1.95701		Ins3	1551358	21243040	0.073029	0.747617		Ins3	16513960	12859632	1.28417	2.03881
CQ1	14837555	14868880	0.997893	3.73042		CQ1	14986608	21399807	0.700315	7.16931		CQ1	5784626	14005450	0.413027	0.65574
CQ2	13725110	14044251	0.977276	3.65334		CQ2	16791837	17016324	0.986808	10.1022		CQ2	5348640	14526972	0.368187	0.58455
CQ3	16386480	8875152	1.84633	6.90213		CQ3	12595446	23038187	0.54672	5.59692		CQ3	5265156	16694141	0.315389	0.500727
CQ+Ins1	14398650	12220648	1.17822	4.40454		CQ+Ins1	13339391	17891680	0.745564	7.63253		CQ+Ins1	7850610	12679821	0.619142	0.982979
CQ+Ins2	14110875	14436045	0.977475	3.65409		CQ+Ins2	11338878	16284489	0.696299	7.12819		CQ+Ins2	6707266	13880592	0.483212	0.767169
CQ+Ins3	20221168	18043362	1.1207	4.1895		CQ+Ins3	23690068	24273156	0.975978	9.99134		CQ+Ins3	6133464	16564324	0.370282	0.587876
	CT	Ins	CQ	CQ+Ins			CT	Ins	CQ	CQ+Ins			CT	Ins	CQ	CQ+Ins
AVG	1	1.31098	4.76196	4.08271		AVG	1	1.25817	7.62281	8.25069		AVG	1	2.29397	0.580339	0.779341
SEM	0.23293	0.325566	1.07031	0.223121		SEM	0.200107	0.255801	1.32018	0.882418		SEM	0.215859	0.149789	0.0447981	0.114218
CHOP						Cleaved caspase-3
	CHOP	GAPDH	CHOP/GAPDH	Fold change			CC3	GAPDH	CC3/GAPDH	Fold change
CT1	2859351	9801207	0.291735	0.937818		CT1	6867705	10998520	0.624421	1.49107
CT2	2993707	9454400	0.316647	1.0179		CT2	2665624	10797800	0.246867	0.589501
CT3	2724125	8385726	0.324853	1.04428		CT3	3666202	9521800	0.385032	0.919429
CQ1	10573563	10380667	1.01858	3.27436		CQ1	9475560	12120264	0.781795	1.86687
CQ2	5842728	7688800	0.759901	2.4428		CQ2	6098547	10912752	0.558846	1.33448
CQ3	7566902	8552310	0.884779	2.84423		CQ3	9527238	11755029	0.810482	1.93537
	CT	CQ					CT	CQ
AVG	1	2.8538				AVG	1	1.71224
SEM	0.0320099	0.240099				SEM	0.26336	0.189911

## Sheet: InVitro-CQ dose
InVitro-CQ dose-10/20/30uM-24hr
p62						LC3-II						Cleaved caspase-3
	p62	GAPDH	p62/GAPDH	Fold change			LC3-II	GAPDH	LC3-II/GAPDH	Fold change			CC3	GAPDH	CC3/GAPDH	Fold change
CT1	4484474	13399230	0.334681	0.994041		CT1	2201848	9878115	0.222902	0.640171		CT1	8113767	6017072	1.34846	1.01803
CT2	3783744	11906934	0.317777	0.943832		CT2	3005218	8697240	0.345537	0.992379		CT2	7471080	4865211	1.53561	1.15933
CT3	4378320	12243448	0.357605	1.06213		CT3	3070002	6447780	0.476133	1.36745		CT3	4997114	4585971	1.08965	0.822643
10uM1	6269940	12908454	0.485724	1.44265		10uM1	3806563	8701012	0.437485	1.25645		10uM1	9683973	6978130	1.38776	1.0477
10uM2	5385387	13577150	0.396651	1.1781		10uM2	3963600	7924410	0.500176	1.4365		10uM2	4534128	3466740	1.30789	0.987407
10uM3	4197305	10620400	0.395212	1.17382		10uM3	3544678	6236864	0.568343	1.63228		10uM3	7095426	5860056	1.21081	0.914114
20uM1	7330033	11966136	0.612565	1.81939		20uM1	6371586	9222638	0.690864	1.98415		20uM1	5776200	6232968	0.926717	0.699634
20uM2	8095035	13680225	0.591733	1.75751		20uM2	5575892	7418854	0.751584	2.15854		20uM2	6818397	4243456	1.6068	1.21307
20uM3	5672550	12329772	0.460069	1.36646		20uM3	5455224	8063484	0.676534	1.943		20uM3	3544082	5717049	0.619915	0.46801
30uM1	9669617	11212318	0.86241	2.56145		30uM1	9763320	8056874	1.2118	3.48028		30uM1	7112066	5128656	1.38673	1.04693
30uM2	11961339	13747422	0.870079	2.58423		30uM2	9540850	7536752	1.26591	3.63568		30uM2	8275298	3297602	2.50949	1.89456
30uM3	9140216	14790399	0.617983	1.83548		30uM3	9554720	8174447	1.16885	3.35693		30uM3	10608232	7496720	1.41505	1.06831
	CT	10uM	20uM	30uM			CT	10uM	20uM	30uM			CT	10uM	20uM	30uM
AVG	1	1.26486	1.64778	2.32705		AVG	1	1.44174	2.02857	3.49096		AVG	1	0.983075	0.793572	1.3366
SEM	0.0342787	0.0889063	0.141793	0.245876		SEM	0.209982	0.108522	0.0660653	0.0806452		SEM	0.097609	0.0386246	0.220149	0.279051
InVitro-CQ dose-20uM-24hr						InVitro-CQ dose-20uM-48hr
p-Akt/Akt						p-Akt/Akt						CHOP						Cleaved caspase-3
	p-Akt	Akt	p-Akt/Akt	Fold change			p-Akt	Akt	p-Akt/Akt	Fold change			CHOP	GAPDH	CHOP/GAPDH	Fold change			CC3	GAPDH	CC3/GAPDH	Fold change
CT1	5675320	11603553	0.489102	1.0319		CT1	4755573	15480648	0.307195	0.870236		CT1	5612736	11937184	0.470189	0.834123		CT1	4931616	11937184	0.413131	0.880805
CT2	7287315	14133816	0.515594	1.0878		CT2	4476112	12270420	0.364789	1.03339		CT2	6351392	11586752	0.54816	0.972444		CT2	5854848	11586752	0.505305	1.07732
CT3	5772851	13835648	0.417245	0.8803		CT3	3684888	9521136	0.387022	1.09637		CT3	8095776	12034208	0.67273	1.19343		CT3	6059424	12399648	0.488677	1.04187
Ins1	8067657	14701674	0.548758	1.15776		Ins1	12955390	12734919	1.01731	2.88189		CQ1	10155712	12468000	0.814542	1.44501		CQ1	8993248	12468000	0.721306	1.53784
Ins2	9376920	13661798	0.686361	1.44808		Ins2	14562645	10845660	1.34272	3.80371		CQ2	8750048	13606592	0.643074	1.14082		CQ2	7996960	13606592	0.587727	1.25305
Ins3	10228296	14197332	0.720438	1.51997		Ins3	11449095	9844236	1.16303	3.29467		CQ3	12546176	15170272	0.827024	1.46715		CQ3	8547328	13231712	0.645973	1.37723
CQ1	6539040	13850202	0.472126	0.996088		CQ1	3286332	11812932	0.278198	0.788092
CQ2	7048300	13136292	0.536552	1.13201		CQ2	3343616	10465783	0.319481	0.90504			CT	CQ					CT	CQ
CQ3	6680535	13285720	0.502836	1.06088		CQ3	2538375	11577755	0.219246	0.62109		AVG	1	1.351				AVG	1	1.38937
CQ+Ins1	10562290	13362320	0.790453	1.66769		CQ+Ins1	7373160	10414608	0.707963	2.00555		SEM	0.104635	0.10528				SEM	0.06047	0.0824371
CQ+Ins2	11061762	13556874	0.815952	1.72149		CQ+Ins2	6282395	10198800	0.615994	1.74502
CQ+Ins3	12603435	14604768	0.862967	1.82068		CQ+Ins3	7192368	11387460	0.631604	1.78924
	CT	Ins	CQ	CQ+Ins			CT	Ins	CQ	CQ+Ins
AVG	1	1.37527	1.06299	1.73662		AVG	1	3.32676	0.771407	1.8466
SEM	0.0619869	0.110717	0.0392524	0.0448075		SEM	0.0673816	0.26659	0.0823927	0.0804937
